# Supplementary material
Source: PubMed Central journal article supplement (PMC9399866)
Supplement: jama-e2213997-s003.pdf [file jama-e2213997-s003.pdf]

## **Data Sharing Statement**

Requests for data will be dealt with by the corresponding author after the study has been published. Subject to approval by the corresponding author and Sun Yat-sen University Cancer Center, de-identified participant data will be available. To evaluate whether a data request is reasonable, a detailed research protocol will be required. Depending on the materials provided by researchers, the corresponding author and Sun Yat-sen University Cancer Centre reserve the right to decide whether to share the data or not.

## **Additional Information**

Explanation for why data not available: Key raw data are available at the Research Data Deposit platform ([www.researchdata.org.cn](http://www.researchdata.org.cn)), with the approval RDD number of RDDA2022251193. Research Data Deposit (RDD) is a comprehensive platform for medical researchers to file their research data and research records to help ensure the authenticity of their research projects. Therefore, RDD is not an open data platform.
